# Supplementary material for: Research progress of self-assembled nanogel and hybrid hydrogel systems based on pullulan derivatives
Source: PubMed Central journal article supplement (PMC6058595; doi:10.1080/10717544.2018.1425776), 2018-01-15
Supplement: IDRD_A_1425776_SM3605.pdf [file IDRD_A_1425776_SM3605.pdf]

(1)

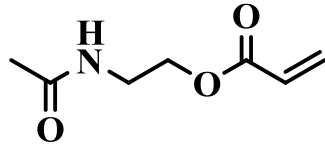

**AOI:** 2-(acryloyloxy)ethyl isocyanate

(2)

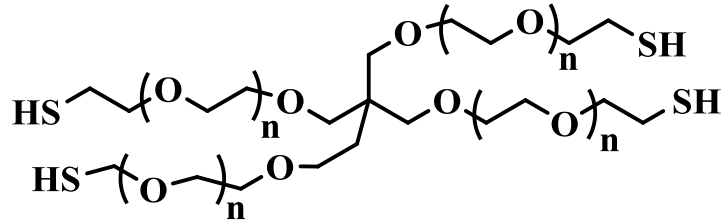

**PEGSH:** Pentaerythritol tetra (mercaptoethyl)polyoxyethylene

(3)

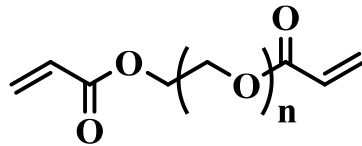

**PEGDA:** Polyethylene glycol diacrylate

(4)

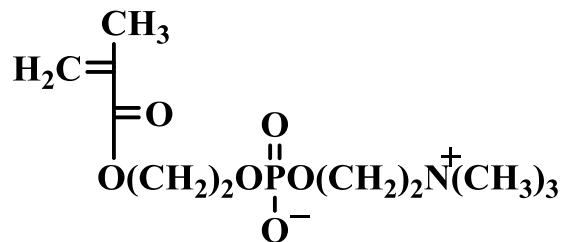

**MPC:** 2-methacryloyloxyethyl phosphorylcholine

(5)

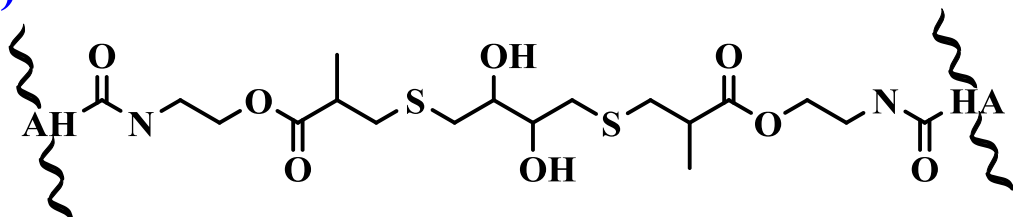

**HA:** Chemically cross-linked Haluronan

(6)

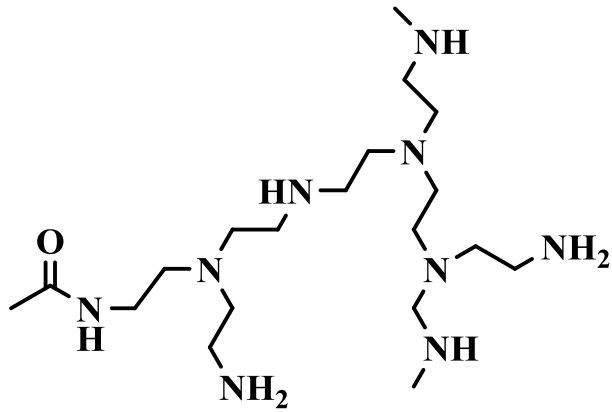

**PEI:** Polyethyleneimine group

(7)

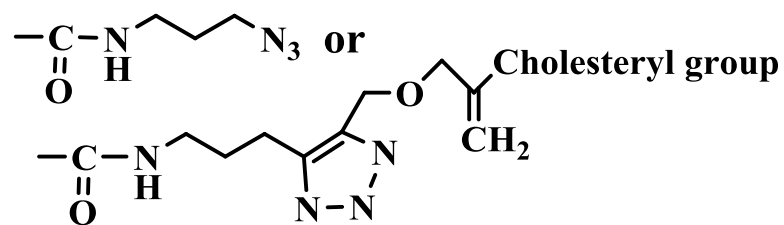

**Acid-labile group**

(8)

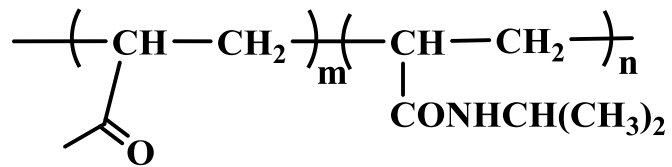

**PNIPAM:** Poly-*N*-isopropylacrylamide

(9)

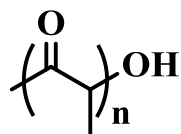

**Poly (L-lactide)**

(10)

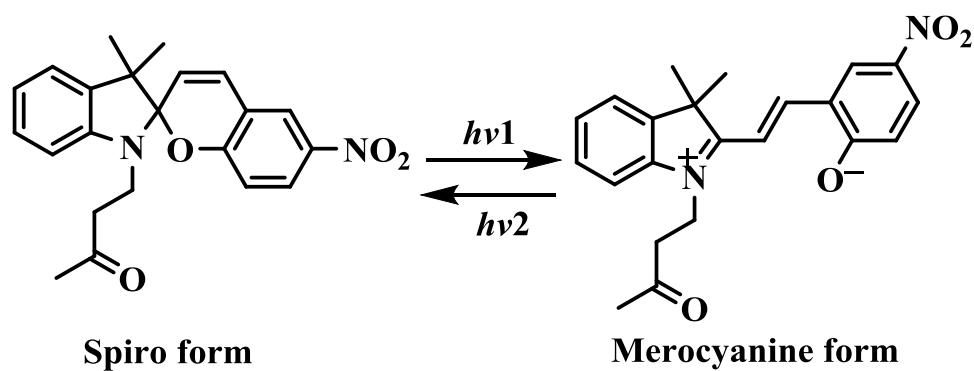

(11)

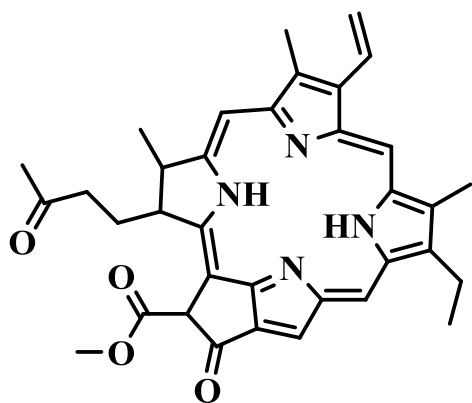

**phA:** Pheophorbides-A group

(12)

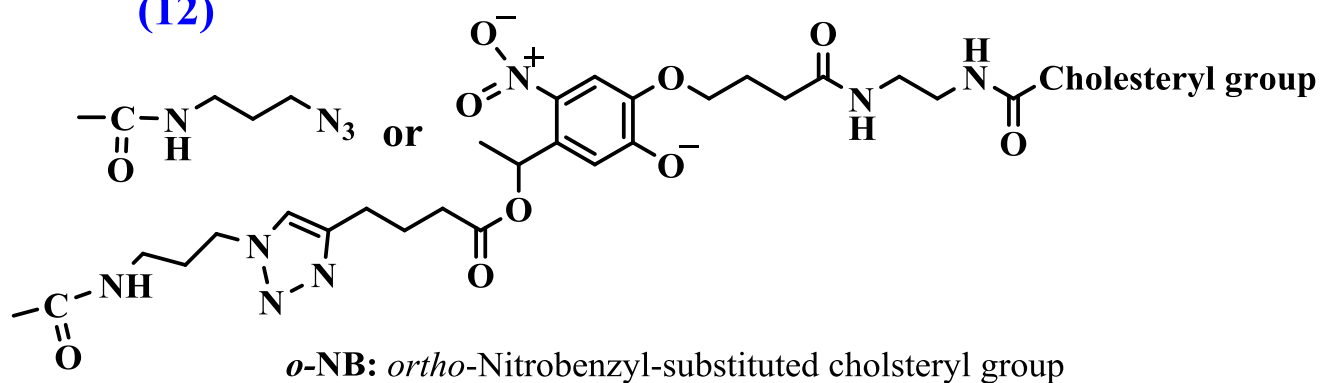

(13)

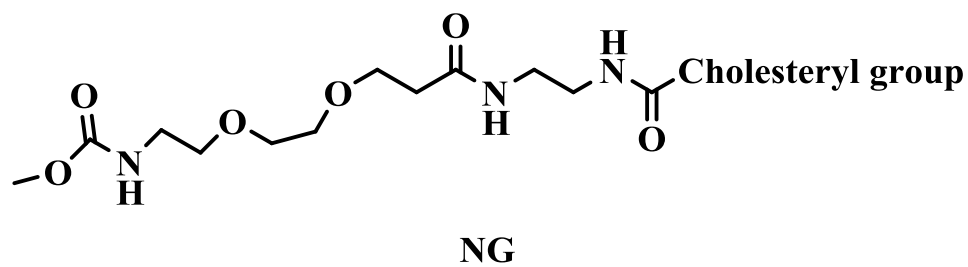

(14)

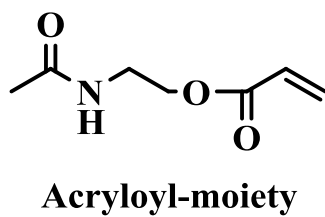

(15)

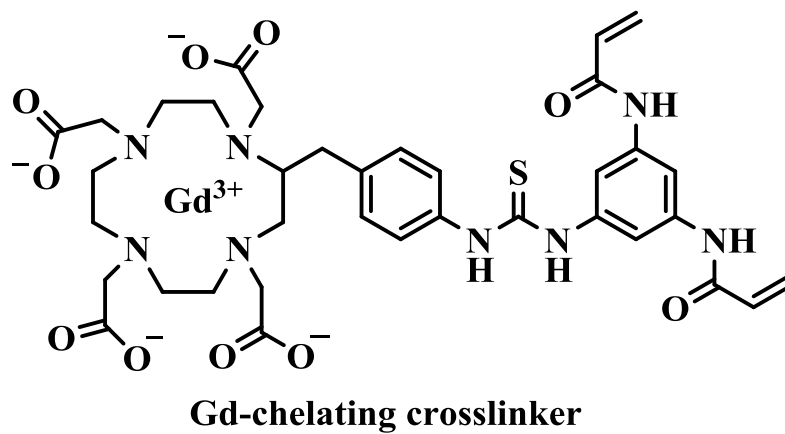

(16)

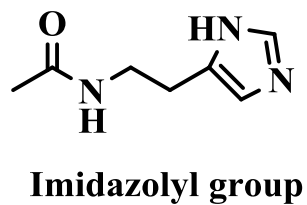

(17)

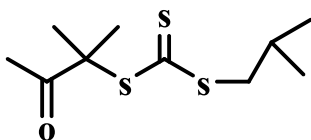

**STS:** Sulfanylthiocarbonylsulfanyl group

(18)

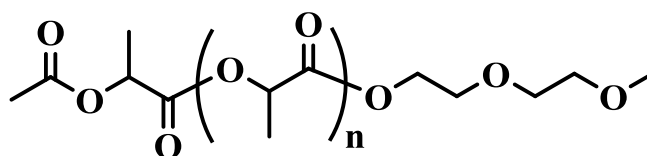

**L-lactic acid oligomer**

(19)

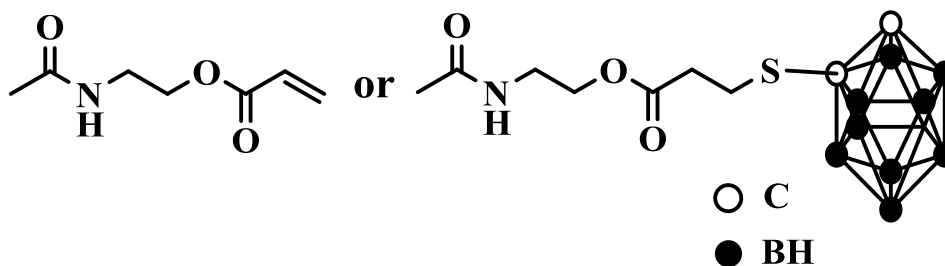

**Modified carborane**
